# Supplementary material for: Prognostic Value of LINC-ROR (rs1942347) Variant in Patients with Colon Cancer Harboring BRAF Mutation: A Propensity Score-Matched Analysis
Source: MDPI journal article supplement (doi:10.3390/biom12040569), 2022-04-12
Supplement: s1 [file s1]

**Table S1.** Characteristics of the LINC-ROR-related intronic variants cited in previous literature

| SNP ID           | Alleles | Type     | MAF  | Genomic location | Overlapping   | Disease       | PMID     |
|------------------|---------|----------|------|------------------|---------------|---------------|----------|
| rs6420545        | T/C     | Intronic | 0.34 | 18:57057008      | 3 transcripts | Breast cancer | 29549263 |
| <b>rs1942347</b> | A/T     | Intronic | 0.47 | 18:57057227      | 3 transcripts | NA            | NA       |
| rs1942348        | T/C     | Intronic | 0.44 | 18:57057466      | 3 transcripts | Breast cancer | 29549263 |
| rs732982         | G/A     | Intronic | 0.18 | 18:57060228      | 7 transcripts | Schizophrenia | 19223858 |
| rs4801078        | T/C     | Intronic | 0.26 | 18:57061452      | 7 transcripts | Breast cancer | 29549263 |
| rs9636089        | T/C     | Intronic | 0.32 | 18:57062094      | 7 transcripts | Breast cancer | 29549263 |

The current studied variant is bold. SNP: Single nucleotide polymorphism; MAF: Minor allele frequency; PMID: PubMed ID; NA: Non-applicable.

**Table S2.** Characteristics of propensity-matched cohorts

| Variable     |                 | Wild type BRAF<br>(n = 120) | Mutant BRAF<br>(n = 60) | <i>p</i> -value |
|--------------|-----------------|-----------------------------|-------------------------|-----------------|
| Age (y)      | ≤60             | 63 (52.5)                   | 29 (48.3)               | 0.63            |
|              | >60             | 57 (47.5)                   | 31 (51.7)               |                 |
| Sex          | Male            | 76 (63.3)                   | 35 (58.3)               | 0.52            |
|              | Female          | 44 (36.7)                   | 25 (41.7)               |                 |
| Location     | Right           | 66 (55)                     | 31 (51.7)               | 0.75            |
|              | Transverse/left | 54 (45)                     | 29 (48.3)               |                 |
| Type         | Adenocarcinoma  | 89 (74.2)                   | 39 (65)                 | 0.22            |
|              | Others          | 31 (25.8)                   | 21 (35)                 |                 |
| Grade        | G1              | 95 (79.2)                   | 41 (68.3)               | 0.14            |
|              | G2/G3           | 25 (20.8)                   | 19 (31.7)               |                 |
| T stage      | T1/2            | 93 (77.5)                   | 39 (65)                 | 0.11            |
|              | T3/4            | 27 (22.5)                   | 21 (35)                 |                 |
| N stage      | Negative        | 50 (41.7)                   | 22 (36.7)               | 0.62            |
|              | Positive        | 70 (58.3)                   | 38 (63.3)               |                 |
| M stage      | Negative        | 96 (80)                     | 48 (80)                 | 1.0             |
|              | Positive        | 24 (20)                     | 12 (20)                 |                 |
| Duke's stage | A/B             | 78 (65)                     | 33 (55)                 | 0.19            |
|              | C/D             | 42 (35)                     | 27 (45)                 |                 |

Data are presented as frequencies (percentages). A two sided-Chi-square test was used. Statistical analysis was set at a *p*-value below 0.05.

**Supplementary Table S3.** Codominant association model for *LINC-ROR* gene variant and mortality risk stratified by BRAF mutation status

| Genotype | Wild-type BRAF |      |                  | Mutant BRAF |      |                         |
|----------|----------------|------|------------------|-------------|------|-------------------------|
|          | Survived       | Died | OR (95%CI)       | Survived    | Died | OR (95%CI)              |
| A/A      | 23             | 17   | <i>Reference</i> | 11          | 14   | <i>Reference</i>        |
| A/T      | 40             | 19   | 0.63 (0.27-1.45) | 17          | 7    | <b>0.27 (0.08-0.90)</b> |
| T/T      | 17             | 4    | 0.32 (0.09-1.12) | 10          | 1    | <b>0.07 (0.01-0.68)</b> |

Multivariate regression analysis was applied. Adjusted odds ratio (OR) and 95% confidence interval (CI) are shown. The models were adjusted for age and sex.

**Table S4.** Impact and linkage disequilibrium (LD) of *LINC-ROR* rs1942347 variant on chromosome 18 with other variants ( $r^2 \geq 0.8$ ) on the same chromosome

| pos<br>(hg38) | LD<br>( $r^2$ ) | LD<br>(D') | variant                     | Ref | Alt | AFR<br>freq. | AMR<br>freq. | ASN<br>freq. | EUR<br>freq. | Proteins<br>bound       | Motifs<br>changed        | GENCODE<br>genes        |
|---------------|-----------------|------------|-----------------------------|-----|-----|--------------|--------------|--------------|--------------|-------------------------|--------------------------|-------------------------|
| 57052460      | 0.97            | 0.99       | <a href="#">rs8093490</a>   | A   | G   | 0.85         | 0.34         | 0.4          | 0.3          | CTCF,<br>RAD21,<br>SMC3 | GCM, Gcm1                | 2.1kb 3' of<br>LINC-ROR |
| 57052965      | 0.85            | 0.99       | <a href="#">rs9953564</a>   | G   | A   | 0.85         | 0.3          | 0.34         | 0.28         |                         |                          | 1.6kb 3' of<br>LINC-ROR |
| 57053146      | 0.85            | 0.99       | <a href="#">rs9945715</a>   | T   | C   | 0.85         | 0.31         | 0.34         | 0.28         |                         | Rad21, SETDB1,<br>Znf143 | 1.4kb 3' of<br>LINC-ROR |
| 57053429      | 0.85            | 0.99       | <a href="#">rs1942343</a>   | T   | G   | 0.86         | 0.31         | 0.34         | 0.28         |                         | Pax-5                    | 1.2kb 3' of<br>LINC-ROR |
| 57053547      | 0.83            | 0.99       | <a href="#">rs1942344</a>   | A   | G   | 0.85         | 0.31         | 0.34         | 0.27         |                         | Zfp187                   | 1kb 3' of<br>LINC-ROR   |
| 57053938      | 0.85            | 0.99       | <a href="#">rs1942345</a>   | G   | C   | 0.86         | 0.3          | 0.34         | 0.28         |                         | 19 altered motifs        | 643bp 3' of<br>LINC-ROR |
| 57054639      | 0.84            | 0.98       | <a href="#">rs948650</a>    | G   | A   | 0.86         | 0.31         | 0.34         | 0.28         |                         | Gm397                    | LINC-ROR                |
| 57055291      | 0.85            | 0.99       | <a href="#">rs9949903</a>   | A   | G   | 0.86         | 0.31         | 0.34         | 0.28         |                         | GR, ZBTB33               | LINC-ROR                |
| 57055463      | 0.85            | 0.99       | <a href="#">rs1893445</a>   | G   | A   | 0.86         | 0.31         | 0.34         | 0.28         |                         | GR                       | LINC-ROR                |
| 57055665      | 0.82            | 0.98       | <a href="#">rs11334455</a>  | AG  | A   | 0.86         | 0.3          | 0.34         | 0.28         |                         | 10 altered motifs        | LINC-ROR                |
| 57056163      | 0.85            | 0.99       | <a href="#">rs6566850</a>   | T   | C   | 0.86         | 0.31         | 0.34         | 0.28         |                         | 5 altered motifs         | LINC-ROR                |
| 57056177      | 0.85            | 0.99       | <a href="#">rs6566851</a>   | T   | A   | 0.86         | 0.31         | 0.34         | 0.28         |                         | 4 altered motifs         | LINC-ROR                |
| 57056519      | 0.85            | 0.99       | <a href="#">rs8095898</a>   | A   | C   | 0.86         | 0.31         | 0.34         | 0.28         |                         | NF-kappa B, Spz1         | LINC-ROR                |
| 57057227      | 1               | 1          | <a href="#">rs1942347</a>   | A   | T   | 0.86         | 0.34         | 0.4          | 0.31         |                         | <b>10 altered motifs</b> | LINC-ROR                |
| 57057466      | 0.86            | 1          | <a href="#">rs1942348</a>   | T   | C   | 0.86         | 0.31         | 0.34         | 0.28         |                         | NF-E2, NRSF              | LINC-ROR                |
| 57057964      | 1               | 1          | <a href="#">rs2027701</a>   | A   | G   | 0.86         | 0.34         | 0.4          | 0.31         | NFKB,<br>YY1            | Egr-1, MIF-1, Pax-4      | LINC-ROR                |
| 57058041      | 0.86            | 1          | <a href="#">rs2027702</a>   | C   | T   | 0.86         | 0.31         | 0.34         | 0.28         | 6 bound<br>proteins     |                          | LINC-ROR                |
| 57064612      | 0.93            | 0.98       | <a href="#">rs9949774</a>   | G   | C   | 0.79         | 0.34         | 0.43         | 0.31         |                         | 4 altered motifs         | LINC-ROR                |
| 57069132      | 0.82            | 0.92       | <a href="#">rs146961366</a> | G   | A   | 0.71         | 0.32         | 0.37         | 0.3          |                         | 4 altered motifs         | LINC-ROR                |
| 57074442      | 0.82            | 0.91       | <a href="#">rs7240941</a>   | G   | A   | 0.65         | 0.44         | 0.46         | 0.31         |                         |                          | 2.3kb 5' of<br>LINC-ROR |
| 57078753      | 0.86            | 0.93       | <a href="#">rs12103936</a>  | A   | G   | 0.84         | 0.46         | 0.46         | 0.31         |                         | Foxo, Spz1               | 6.6kb 5' of<br>LINC-ROR |
| 57079317      | 0.86            | 0.93       | <a href="#">rs7235435</a>   | T   | C   | 0.84         | 0.46         | 0.46         | 0.31         |                         | GCM                      | 7.2kb 5' of<br>LINC-ROR |
| 57080624      | 0.86            | 0.93       | <a href="#">rs12967435</a>  | T   | C   | 0.84         | 0.46         | 0.46         | 0.31         |                         | Egr-1                    | 8.5kb 5' of<br>LINC-ROR |
| 57083093      | 0.86            | 0.93       | <a href="#">rs4801080</a>   | G   | A   | 0.84         | 0.46         | 0.46         | 0.31         |                         | E2F                      | 11kb 5' of<br>LINC-ROR  |
| 57084496      | 0.85            | 0.92       | <a href="#">rs9946685</a>   | A   | G   | 0.67         | 0.44         | 0.46         | 0.31         |                         |                          | 12kb 5' of<br>LINC-ROR  |
| 57084832      | 0.82            | 0.92       | <a href="#">rs33939725</a>  | GT  | G   | 0.83         | 0.46         | 0.44         | 0.3          |                         | Gm397                    | 13kb 5' of<br>LINC-ROR  |

pos: position, hg38: human genome release number 38, LD: linkage disequilibrium, Ref: reference allele, Alt: alternative allele, AFR: African, AMR: American, ASN: Asian, EUR: European, freq: frequency. The bold polymorphism is the studied variant in this study. Data source: HaploReg v 4.1. (<https://pubs.broadinstitute.org/mammals/haploreg/haploreg.php>) (last accessed March 2022).
